# Supplementary material for: A new design for an artificial cell: polymer microcapsules with addressable inner compartments that can harbor biomolecules, colloids or microbial species
Source: Royal Society of Chemistry journal article supplement (doi:10.1039/c7sc01335c), 2017-01-01
Supplement: c7sc01335c1.pdf [file c7sc01335c1.pdf]

**Supporting Information for:**

**A New Design for an Artificial Cell: Polymer Microcapsules with Addressable Inner Compartments  
that Can Harbor Biomolecules, Colloids or Microbial Species**

Annie Xi Lu,<sup>1†</sup> Hyuntaek Oh,<sup>1†</sup> Jessica L. Terrell,<sup>2</sup> William E. Bentley,<sup>1,2</sup> and Srinivasa R. Raghavan<sup>1,2\*</sup>

<sup>1</sup>Department of Chemical and Biomolecular Engineering, University of Maryland, College Park, MD 20742, USA

<sup>2</sup>Fischell Department of Bioengineering, University of Maryland, College Park, MD 20742, USA

<sup>†</sup>Equal contribution; \*Corresponding author. Email: sraghava@umd.edu

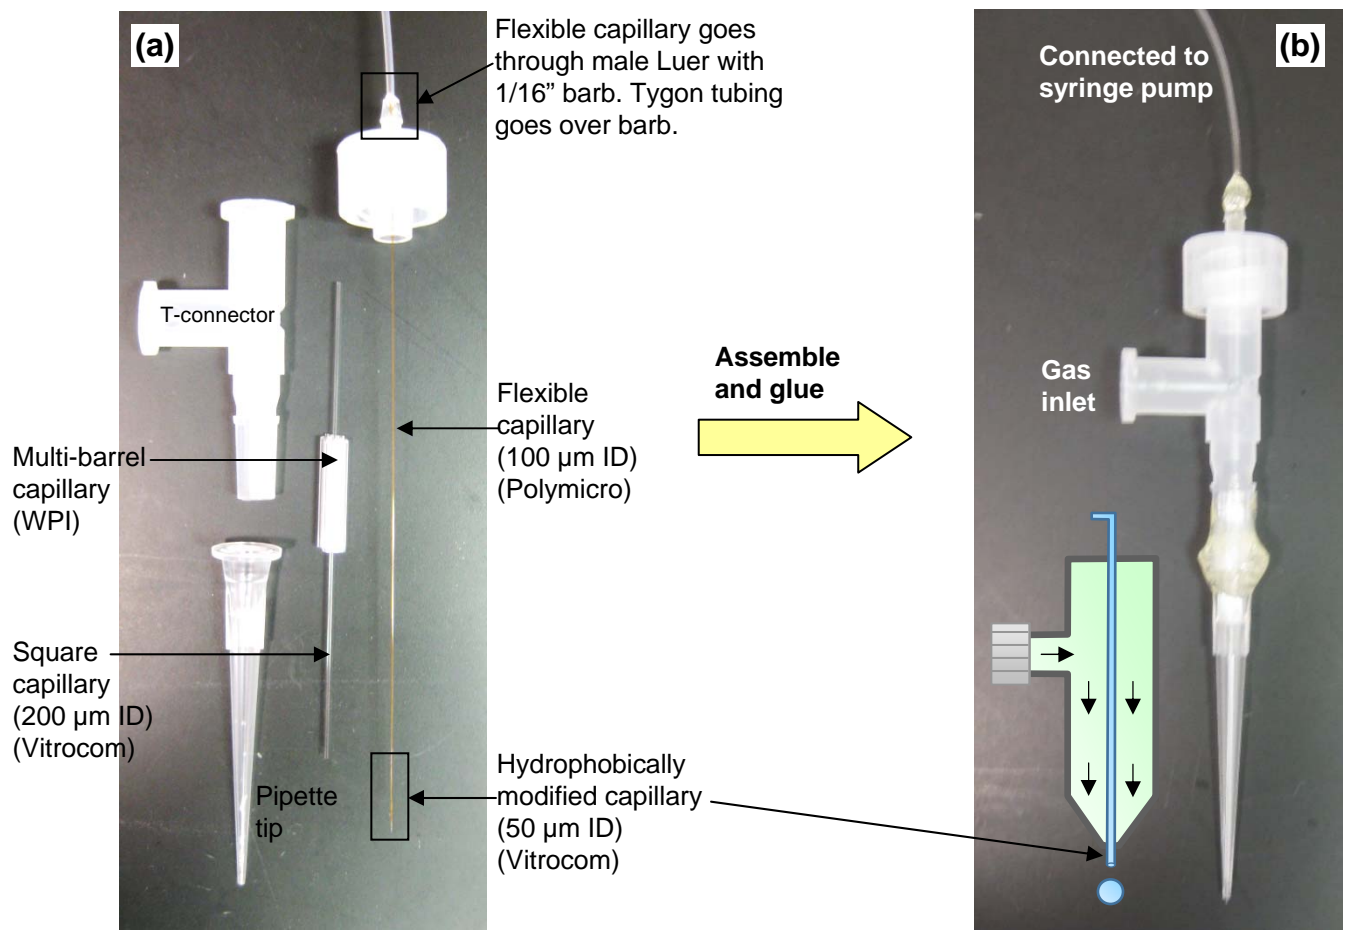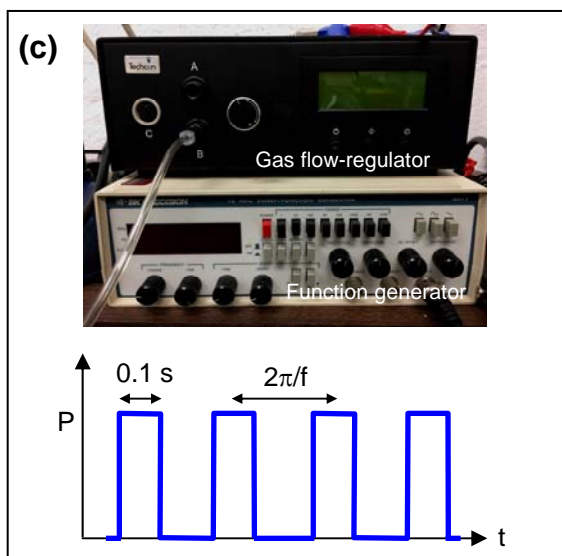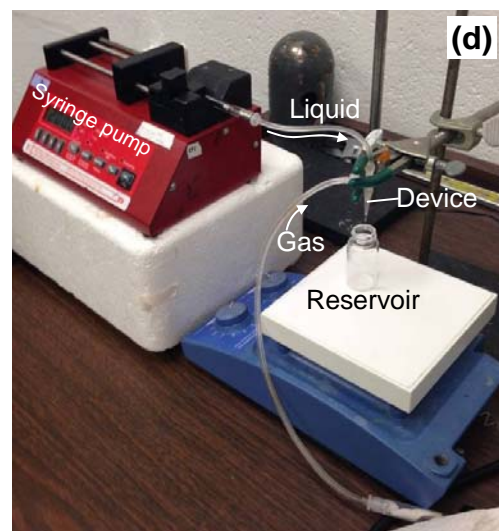

**Figure S1. Photos and details of the microfluidic setup used to generate capsules and MCCs.** The components of the microfluidic device are shown in (a). After assembly and gluing with epoxy, the final device is shown in (b). The schematic in Figure 2 is reproduced as an inset to show the correspondence to the actual device. Note that the liquid finally emerges out of the capillary with a 50  $\mu\text{m}$  ID. In (c), a photo of the function generator and gas flow-regulator is shown. The gas is sent as pulses at a pressure  $P$ , with each pulse over a duration of 0.1 s and with the spacing between pulses dictated by the frequency  $f$ . In (d), a photo of the device in operation is shown, along with the syringe pump and collection reservoir (vial).

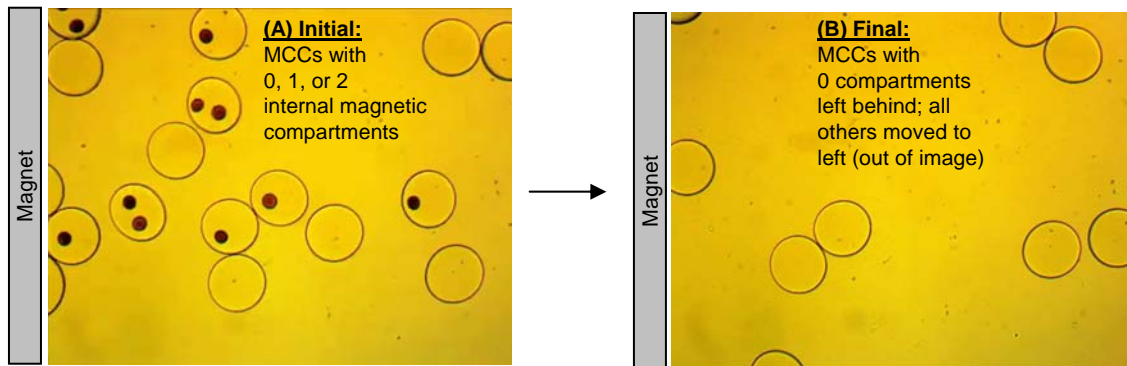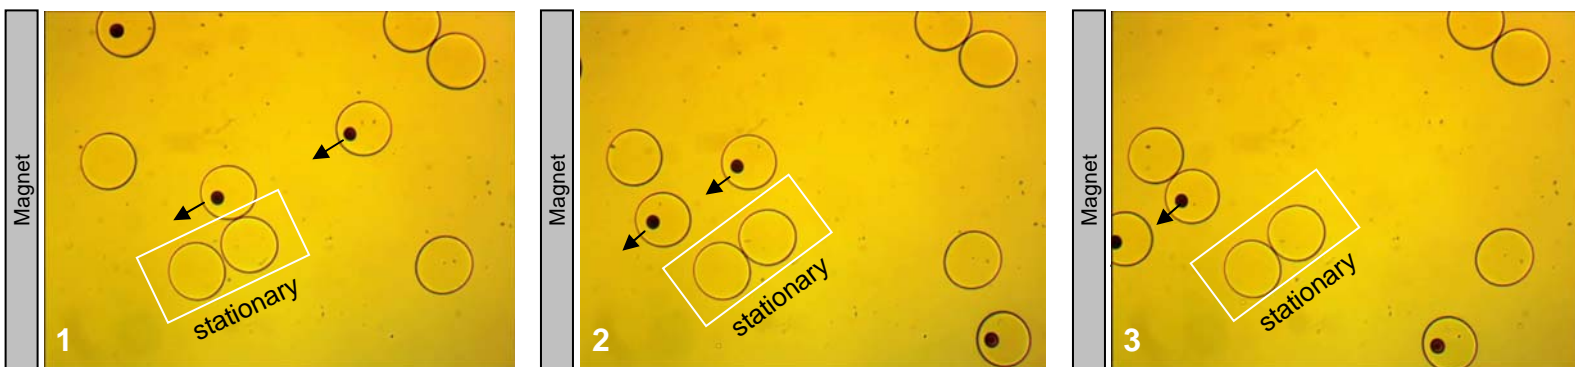

**Figure S2. Magnetic sorting of multicompartment capsules (MCCs).** The images in this figure are stills from a movie. (Top panel) The initial and final images from the movie. In the initial image, a population of MCCs is shown in which the internal compartments (smaller capsules) have magnetic nanoparticles and hence a brown color. Some of the MCCs do not have an internal compartment (i.e., they are not really MCCs) while others have 1 or 2 such compartments. At  $t = 0$ , a bar magnet is placed to the left of this volume. This induces the MCCs with 1 or 2 internal compartments to move towards the left (out of the screen) due to their magnetic properties. In the final image, the bare MCCs alone are left behind. (Bottom panel) A succession of stills from the movie are shown in Images 1, 2, and 3 to demonstrate that the MCCs with arrows are moving towards the left relative to the stationary pair of MCCs marked with a box.
